# Supplementary material
Source: PubMed Central journal article supplement (PMC2958625)
Supplement: 453634.f1.pdf [file 453634.f1.pdf]

### Supplementary Figures Legends

**Supplementary Figure 1:** Analysis of a representative Ficoll-density purified CLL blood sample. Using 4 color flow cytometry, the majority of cells, 85%, show dual staining for both CD5 and CD20.

**Supplementary Figure 2:** Western blotting analyses of 4 representative CLL patient cells for ROR-1 expression.

**Supplementary Figure 3:** Real time RT-PCR analysis of 20 CLL patients cells for FLT-3 expression.

**Supplementary Figure 4:** Quantitative real time RT-PCR on 21 low stage CLL patients for ZAP-70 and p53. ZAP70 is over-expressed and p53 is down regulated in low stage CLL.

Supplementary Figure 1

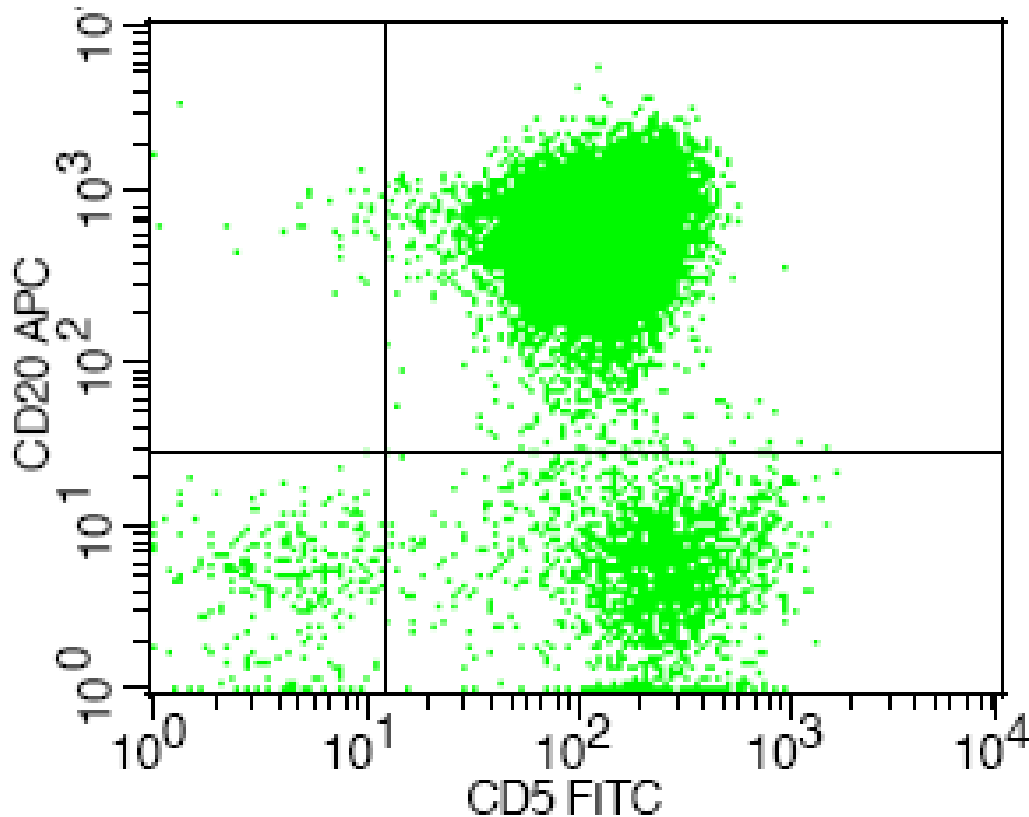

Supplementary Figure 2

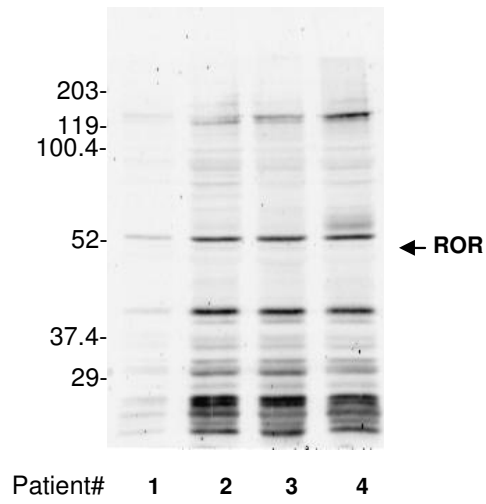

Supplementary Figure 3

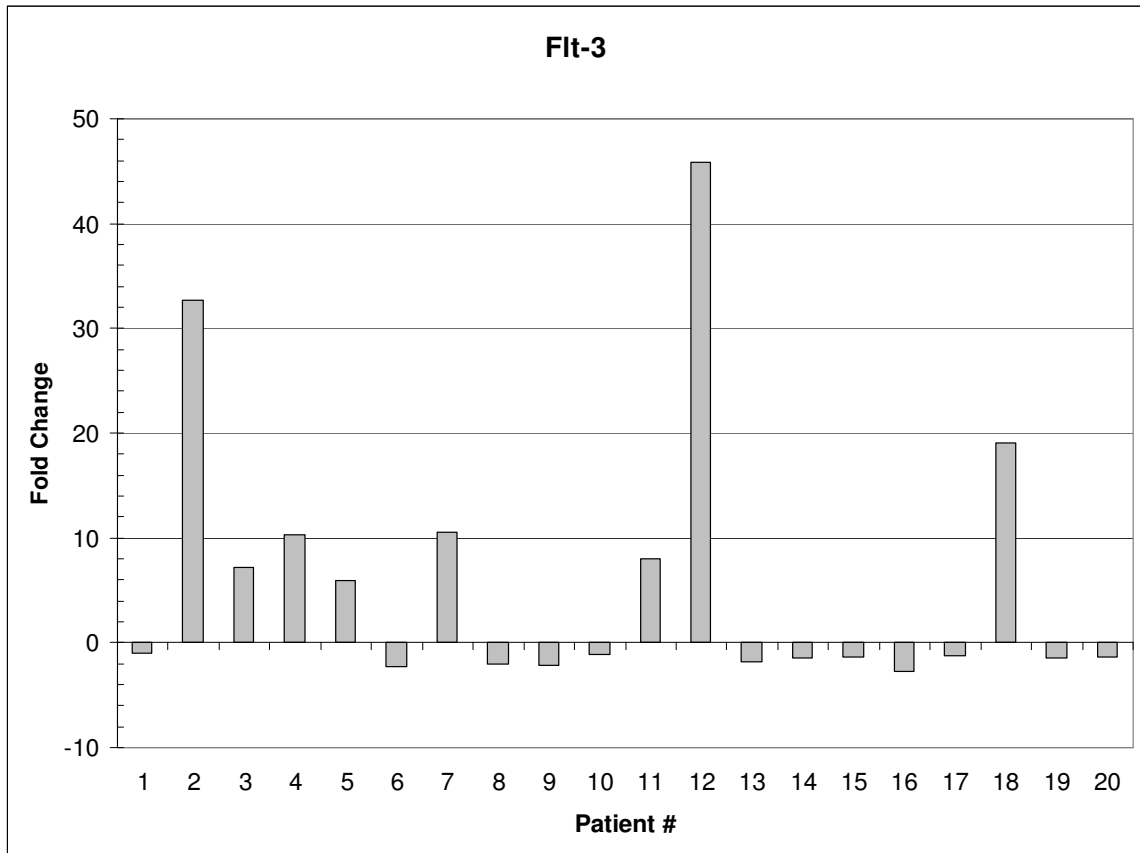

Supplementary Figure 4

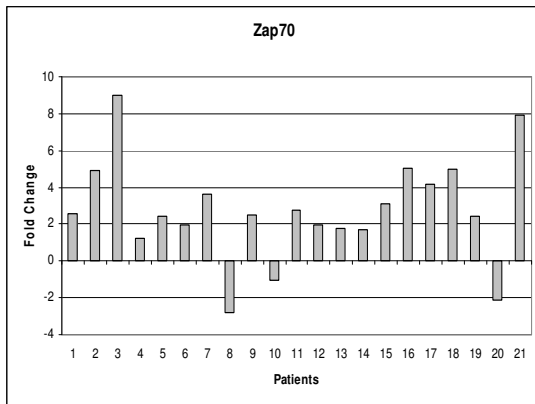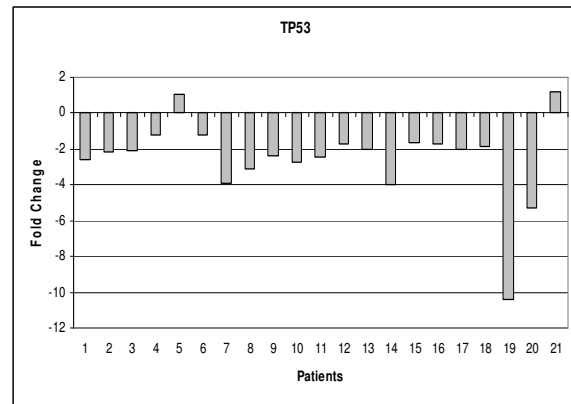

Supplementary Table 1: **Differential GEP of low stage CLL cells at 0-Hr Vs 24-Hr in Culture**

| Affy ID     | Fold Change | Gene Title                                               |
|-------------|-------------|----------------------------------------------------------|
| 214974_x_at | 119.7       | Chemokine (C-X-C motif) ligand 5                         |
| 204614_at   | 75.36       | Serine (or cysteine) proteinase inhibitor, member 2      |
| 216598_s_at | 38.32       | Chemokine (C-C motif) ligand 2                           |
| 207850_at   | 37.40       | Chemokine (C-X-C motif) ligand 3                         |
| 211506_s_at | 29.48       | Homo sapiens interleukin 8 C-terminal variant (IL8) mRNA |
| 39402_at    | 26.02       | Interleukin 1, beta                                      |
| 201110_s_at | 24.98       | Thrombospondin 1                                         |
| 202859_x_at | 24.34       | Interleukin 8                                            |
| 204470_at   | 24.30       | Chemokine (C-X-C motif) ligand 1                         |
| 209774_x_at | 20.14       | Chemokine (C-X-C motif) ligand 2                         |
| 205067_at   | 18.29       | Interleukin 1, beta                                      |
| 201109_s_at | 15.20       | Thrombospondin 1                                         |
| 205476_at   | 13.62       | Chemokine (C-C motif) ligand 20                          |
| 210118_s_at | 11.85       | Interleukin 1, alpha                                     |
| 205114_s_at | 10.26       | Chemokine (C-C motif) ligand 3                           |
| 205207_at   | 8.896       | Interleukin 6                                            |
| Affy ID     | Fold Change | Gene Title                                               |
| 203865_s_at | -5.847      | Adenosine deaminase, RNA-specific, B1                    |
| 206641_at   | -6.024      | Tumor Necrosis factor receptor superfamily, member 17    |
| 209189_at   | -6.451      | V-fos FBJ murine osteosarcoma viral oncogene homolog     |
| 205237_at   | -6.944      | Ficolin (collagen/fibrinogen domain containing) 1        |
| 221841_s_at | -8.064      | Kruppel-like factor 4 (gut)                              |
| 213975_s_at | -10.020     | AV711904 DCA Homo sap cDNA clone DCAAIE08 5' sequence    |

Supplementary Table 2: **Differential GEP of low stage CLL cells treated with thalidomide at 24-Hr in culture.**

| Affy ID     | Fold Change | Gene Title                                                  |
|-------------|-------------|-------------------------------------------------------------|
| 207852_at   | 2.502       | Chemokine ligand 5                                          |
| 201367_s_at | 2.377       | Zinc finger protein 36                                      |
| 214971_s_at | 2.157       | Sialytransferase 1                                          |
| 204805_s_at | 2.137       | H1 histone family member X                                  |
| 213887_s_at | 2.113       | Polymerase (ma) II polypeptide E                            |
| 208621_s_at | 2.11        | Villin 2                                                    |
| 213986_s_at | 2.096       | Chromosome 19 open reading frame 6                          |
| 217234_s_at | 2.096       | Villin 2                                                    |
| 201109_s_at | -2.212      | Thrombospondin 1                                            |
| 204439_at   | -2.283      | Chromosome 1 open reading frame 29                          |
| 203153_at   | -2.309      | Interferon-induced protein with tetratricipeptide repeats 1 |
| 201110_s_at | -2.404      | Thrombospondin 1                                            |
